# Supplementary material for: Bifunctional AlN:Tb semiconductor with luminescence and photocatalytic properties
Source: Royal Society of Chemistry journal article supplement (doi:10.1039/c5ra15716a), 2015-01-01
Supplement: c5ra15716a1.pdf [file c5ra15716a1.pdf]

## Electronic Supplementary Information

### Bifunctional AlN:Tb Semiconductor with Luminescence and Photocatalytic Properties

Wei Wang<sup>a</sup>, Peng Zhang<sup>a</sup>, Xiaobai Wang<sup>a</sup>, Xiang Lei<sup>a</sup>, Hong Ding<sup>b</sup> and Hua Yang<sup>a\*</sup>

<sup>a</sup>College of Chemistry, Jilin University, Changchun, 130012, China

<sup>b</sup>State Key Laboratory of Inorganic Synthesis and Preparative Chemistry,

Jilin University, Changchun, 130021, P. R. China

\*Corresponding author

E-mail address: huayang86@sina.com

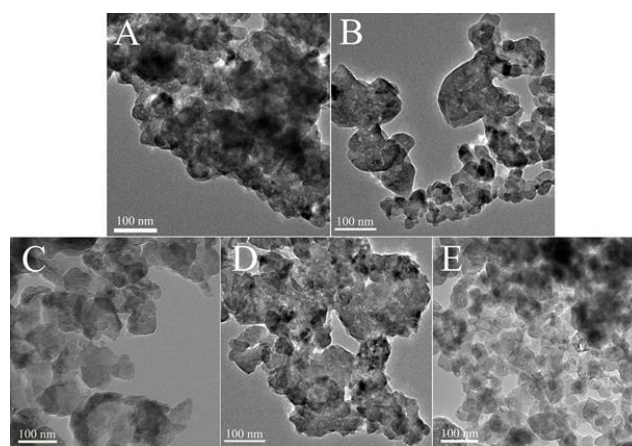

Fig. S1 TEM images of AlN samples doped with (A) 0.1%, (B) 0.3%, (C) 0.5%, (D) 0.8%, (E) 1% Tb.

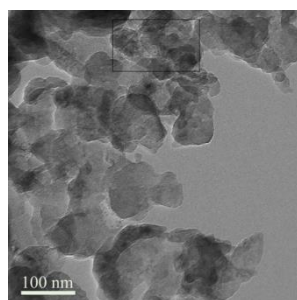

Fig. S2 HRTEM image of AlN:Tb nanoparticles

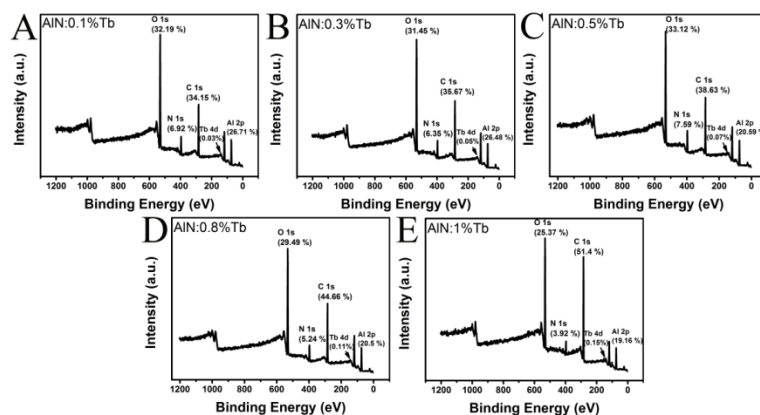

Fig. S3 Wide scan XPS spectra of AlN doped with Tb samples.

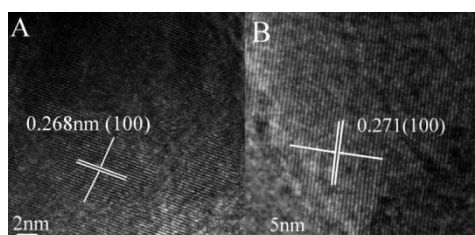

Fig. S4 HRTEM images of undoped AlN (A) and AlN:0.5%Tb (B).

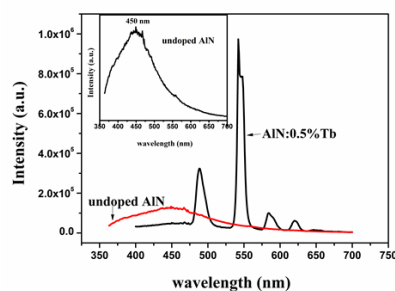

Fig. S5 PL emission spectra of undoped AlN and AlN:0.5%Tb samples. The inset shows the PL spectrum of undoped AlN sample.

As shown in Fig. S4, we compare the PL spectra of the undoped AlN and AlN:0.5%Tb sample. Only an emission band located at 450 nm can be seen in the PL spectrum of undoped AlN, which originates from the lattice defects in AlN matrix. Similar PL characteristics have been reported in undoped AlN (*J. AM. CHEM. SOC.* 2005, 127, 1318-1322; *J. Phys. Chem. C* 2009, 113, 14245–14248; *J. Phys. Chem. C* 2007, 111, 12639-12642). According to the previous researches, the PL emission induced by the lattice defects is usually broad band but not narrow lines. However, the PL spectrum of AlN:0.5%Tb shows the characteristic narrow line emissions of Tb ions. The sharp line emissions at 489, 542, 583, 623 nm correspond to the transitions from the excited  $^5D_4$  state to the  $^7F_J$  ( $J=6, 5, 4, 3$ ) states of  $Tb^{3+}$ . Therefore, the green emission comes from the Tb doping rather than the lattice defects.

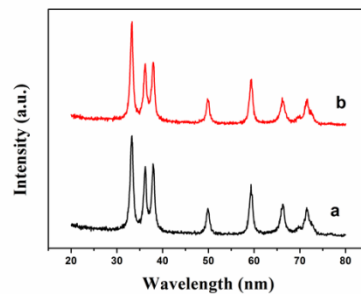

Fig. S6 XRD patterns of AlN:0.5% Tb sample (a) before and (b) after the photocatalytic H<sub>2</sub> evolution experiment.
